# Supplementary material for: Enhancement of the Cytotoxicity of Quinazolinone Schiff Base Derivatives with Copper Coordination
Source: MDPI journal article supplement (doi:10.3390/inorganics11100391), 2023-10-02
Supplement: s1 [file s1]

## Supplementary material

### Enhancement of the cytotoxicity of quinazolinone Schiff base derivatives by copper coordination

Ilona Gurgul<sup>1</sup>, Jana Hricovíniová<sup>2</sup>, Olga Mazuryk<sup>1</sup>, Zuzana Hricovíniová<sup>3,\*</sup> and Małgorzata Brindell<sup>1,\*</sup>

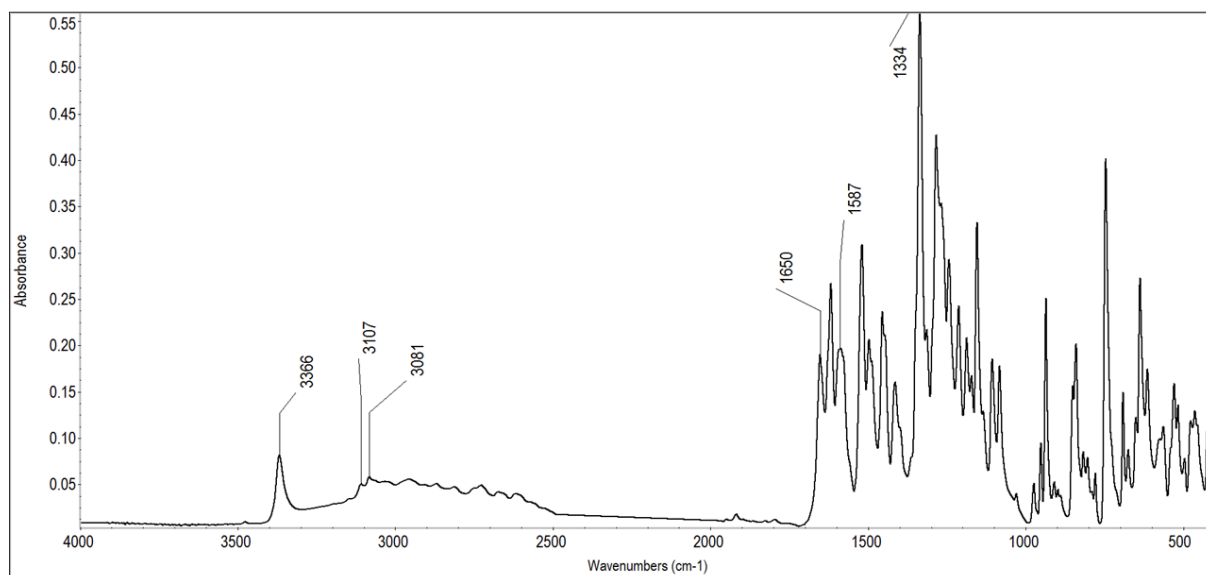

**Figure S1.** The FT-IR spectrum of the free ligand L1.

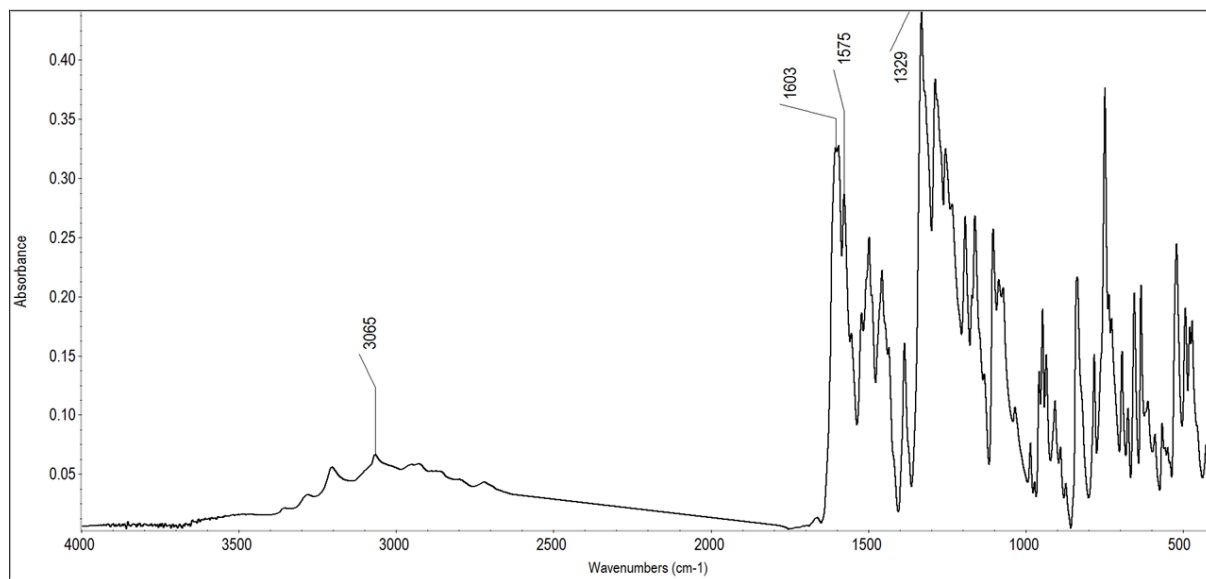

**Figure S2.** The FT-IR spectrum of the Cu-L1 complex.

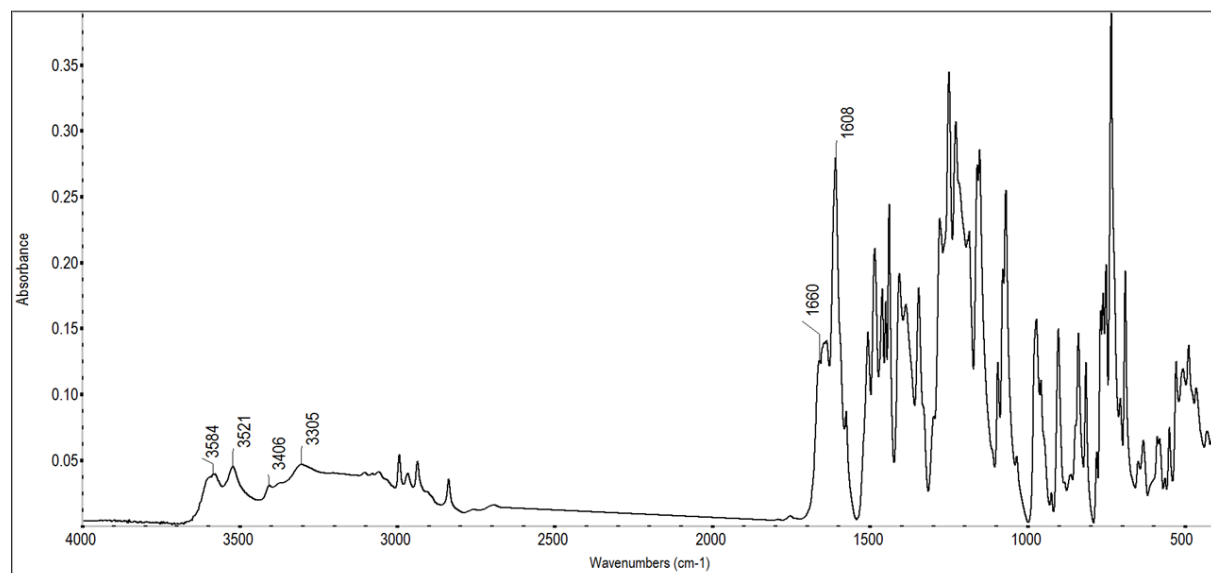

**Figure S3.** The FT-IR spectrum of the free ligand **L2**.

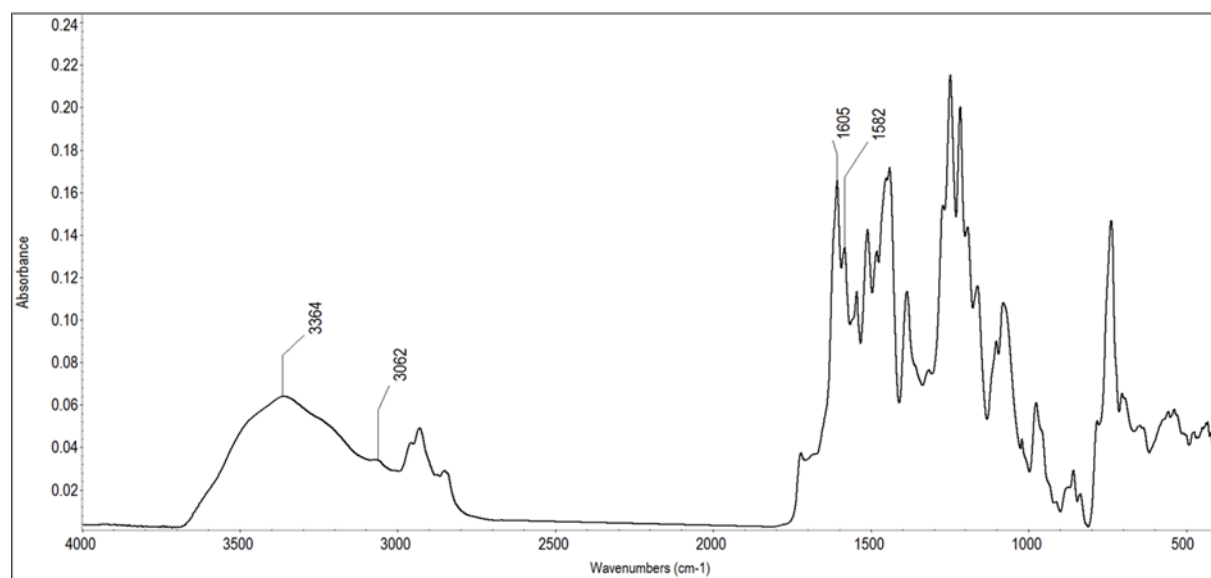

**Figure S4.** The FT-IR spectrum of the **Cu-L2** complex.

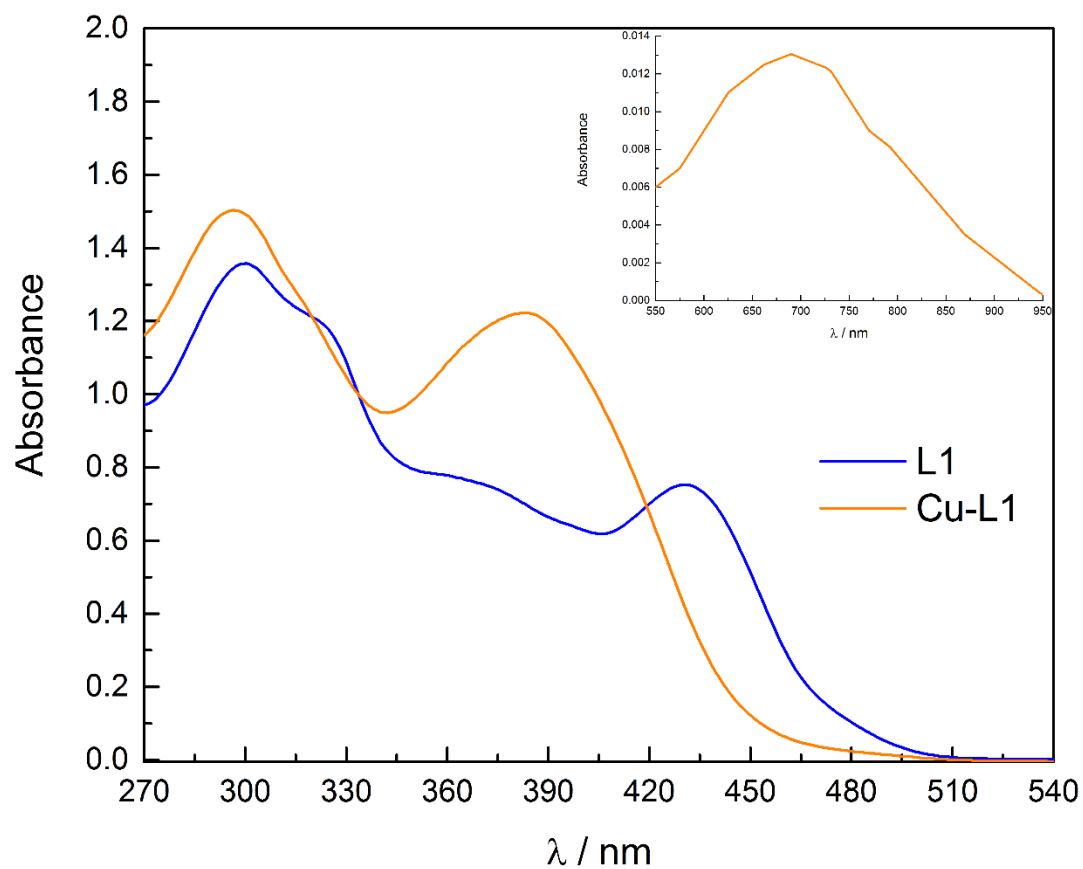

**Figure S5.** The electronic absorption spectra of the free ligand **L1** (blue line) and the **Cu-L1** complex (orange line) measured in DMSO at 0.1 mM concentration. The inset shows absorption band of **Cu-L1** complex obtained at higher concentration (1 mM) in order to register the d-d transitions.

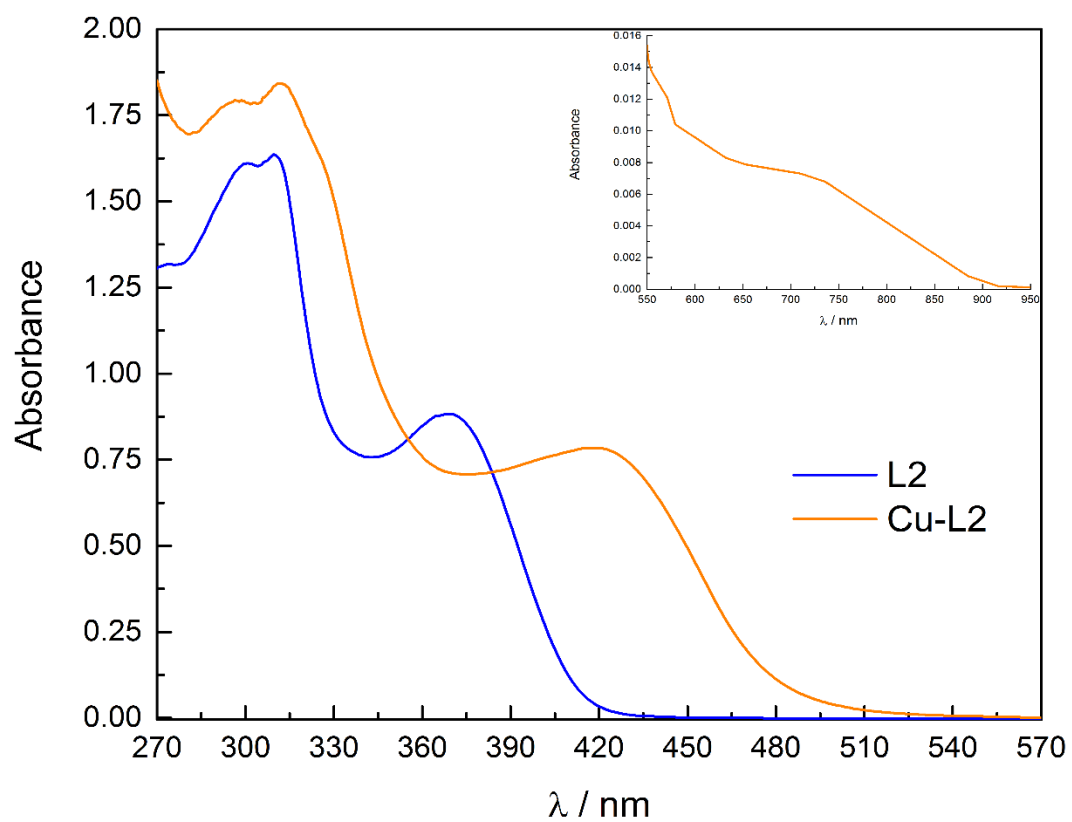

**Figure S6.** The electronic absorption spectra of the ligand **L2** (blue line) and the **Cu-L2** complex (orange line) measured in DMSO at 0.1 mM concentration. The inset shows absorption band of **Cu-L2** complex obtained at higher concentration (1 mM) in order to register the d-d transitions.

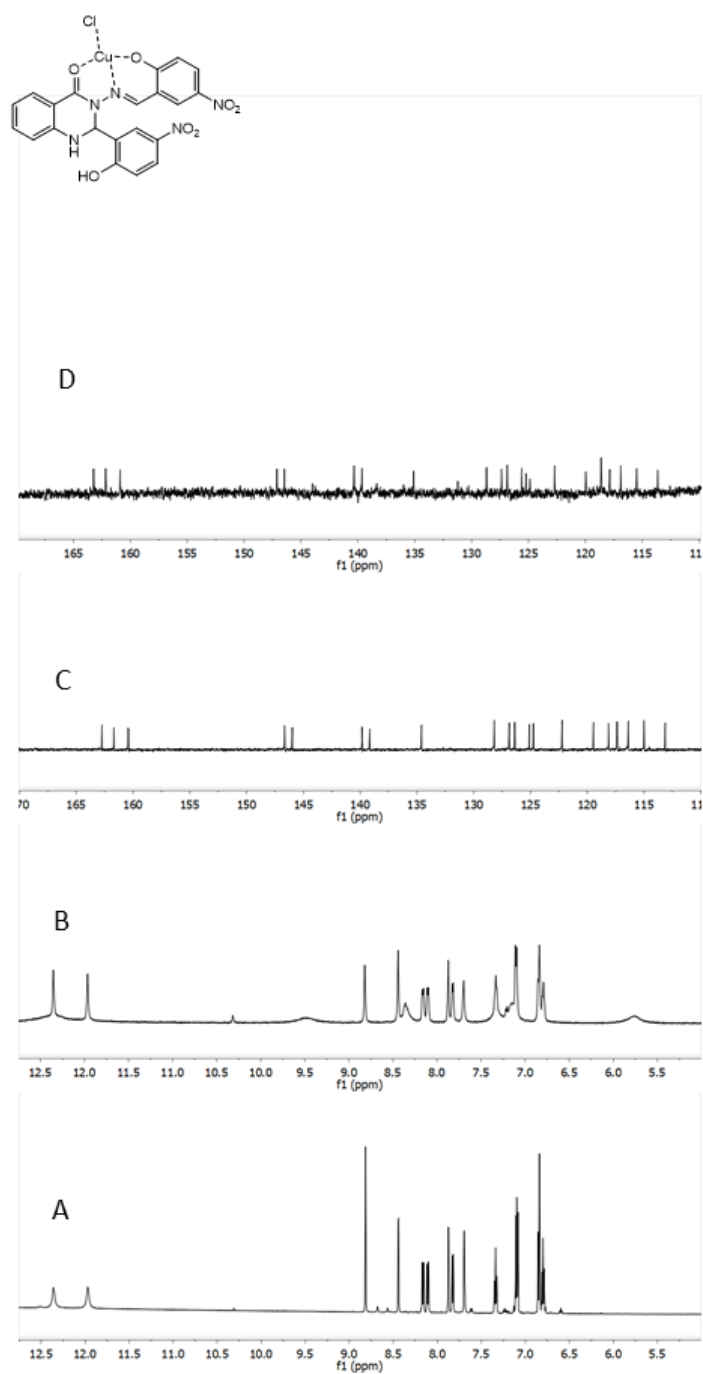

**Figure S7.** <sup>1</sup>H NMR and <sup>13</sup>C spectra of the ligand **L1** (A and C, respectively) and its copper complex (with 30 % excess of the ligand **L1**) **Cu-L1** (B and D).

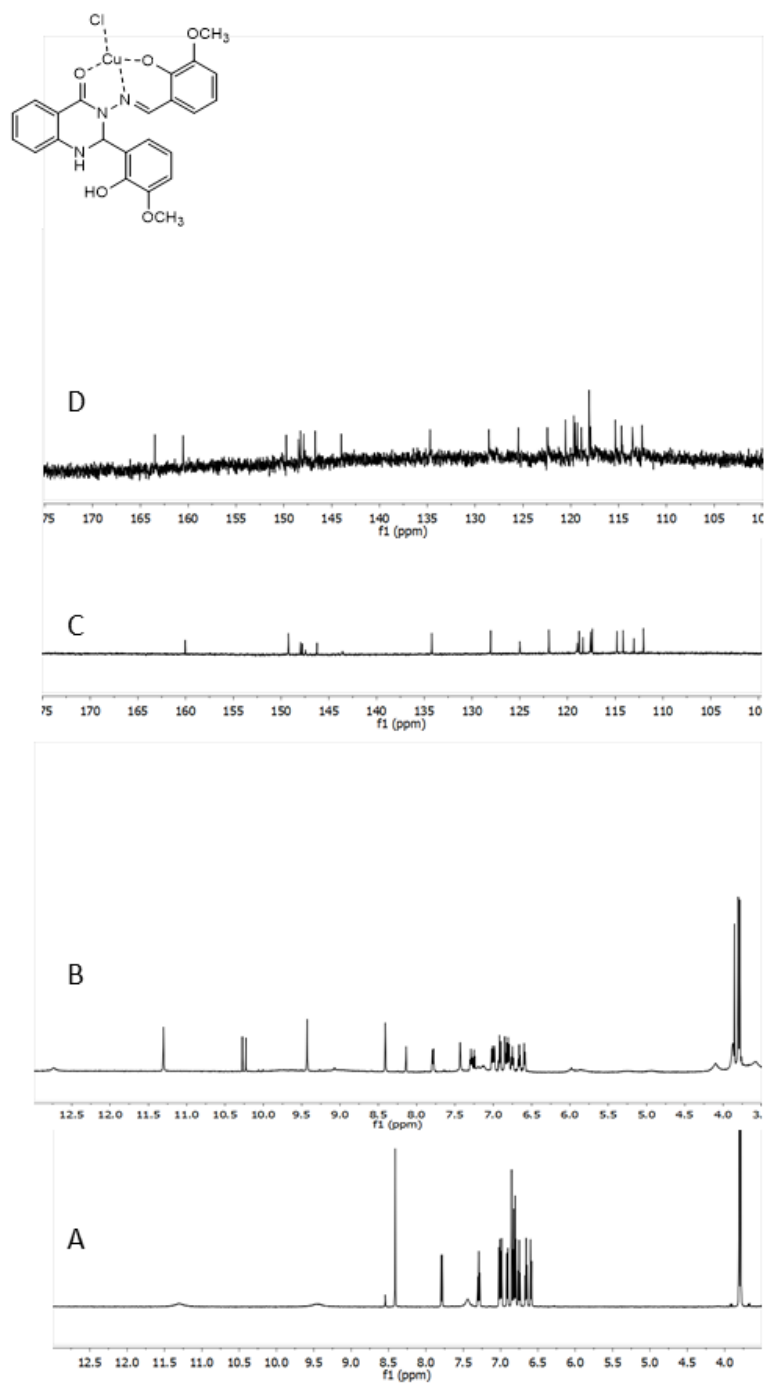

**Figure S8.**  $^1\text{H}$  NMR and  $^{13}\text{C}$  spectra of the ligand **L2** (A and C, respectively) and its copper complex (with 30 % excess of the ligand **L2**) **Cu-L2** (B and D).

**Table S1.** The selected theoretical bond lengths (in Å) data of the studied **Cu-L1** and **Cu-L2** complexes obtained from gas-phase DFT calculations using APFD/LanL2DZ approach.

| Atom 1 | Atom 2 | Length / Å |       |
|--------|--------|------------|-------|
|        |        | Cu-L1      | Cu-L2 |
| Cu     | Cl     | 2.23       | 2.24  |
| Cu     | O4     | 1.98       | 1.96  |
| Cu     | O2''   | 1.90       | 1.89  |
| Cu     | N4     | 1.99       | 1.98  |
| Cu     | O      | 2.22       | 2.27  |
| O4     | C4     | 1.27       | 1.28  |
| N3     | C4     | 1.38       | 1.38  |
| N3     | N4     | 1.39       | 1.40  |
| C9     | N4     | 1.31       | 1.31  |
| C9     | C1''   | 1.43       | 1.43  |
| C2''   | C1''   | 1.45       | 1.44  |
| C2''   | O2''   | 1.31       | 1.32  |

**Table S2.** The selected theoretical bond angles (in degrees) data of the studied **Cu-L1** and **Cu-L2** complexes obtained from gas-phase DFT calculations using APFD/LanL2DZ approach.

| Atom 1 | Atom 2 | Atom 3 | Angle / deg |       |
|--------|--------|--------|-------------|-------|
|        |        |        | Cu-L1       | Cu-L2 |
| Cl     | Cu     | N4     | 172.3       | 174.7 |
| Cl     | Cu     | O4     | 91.9        | 94.0  |
| Cl     | Cu     | O2''   | 96.1        | 93.3  |
| Cl     | Cu     | O      | 85.5        | 88.2  |
| N4     | Cu     | O2''   | 91.5        | 91.2  |
| N4     | Cu     | O4     | 80.9        | 81.5  |
| O2''   | Cu     | O4     | 166.3       | 172.7 |
| O2''   | Cu     | O      | 109.0       | 87.1  |
| O4     | Cu     | O      | 82.7        | 94.1  |
| Cu     | O2''   | C2''   | 129.4       | 129.7 |
| Cu     | O4     | C4     | 113.0       | 113.4 |
| O4     | C4     | N3     | 119.2       | 119.3 |
| C9     | N4     | N3     | 121.6       | 121.2 |
| C4     | N3     | C2     | 123.5       | 122.5 |
| O2''   | C2''   | C1'    | 124.3       | 124.2 |

**Table S3.** The selected theoretical dihedral angles (in degrees) data of the studied **Cu-L1** and **Cu-L2** complexes obtained from gas-phase DFT calculations in the using APFD/LanL2DZ approach.

| Atom 1 | Atom 2 | Atom 3 | Atom 4 | Angle / deg |        |
|--------|--------|--------|--------|-------------|--------|
|        |        |        |        | Cu-L1       | Cu-L2  |
| C4     | O4     | Cu     | O2''   | 70.5        | 14.0   |
| C4     | N3     | N4     | C9     | 178.4       | 179.4  |
| O4     | Cu     | O2''   | C2''   | -63.4       | 27.1   |
| O4     | Cu     | N4     | N3     | -11.0       | -8.2   |
| O2''   | Cu     | N4     | N3     | -179.5      | 170.1  |
| O      | Cu     | N4     | N3     | 71.4        | 83.6   |
| O      | Cu     | O2''   | C2''   | 84.3        | 111.5  |
| O      | Cu     | N4     | C9     | -99.2       | -89.9  |
| Cl     | Cu     | N4     | N3     | 6.9         | -20.1  |
| Cl     | Cu     | O2''   | C2''   | 171.6       | -159.7 |
| Cu     | O2''   | C2''   | C1''   | 3.8         | -16.6  |
| C1''   | C9     | N4     | N3     | -178.1      | -178.9 |
| C9     | N4     | N3     | C4     | 178.4       | 179.4  |
| C9     | N4     | N3     | C2     | 8.7         | 16.0   |
| N3     | C2     | C1'    | C6'    | 10.1        | 6.5    |
